# Supplementary material for: Photochromic porous organic crystals constructed by the self-assembly of triarylethylene derivatives
Source: Royal Society of Chemistry journal article supplement (doi:10.1039/d3qm00460k), 2023-01-01
Supplement: d3qm00460k1.pdf [file d3qm00460k1.pdf]

## Supporting Information

### **Photochromic porous organic crystals constructed by the self-assembly of triarylethylene derivatives**

*Xiayu Zhang,<sup>+</sup> Haodong Sun,<sup>+</sup> Kam-Hung Low, Tao Yu,\* Vonika Ka-Man Au\**

X. Zhang, V. K.-M. Au

Department of Science and Environmental Studies

The Education University of Hong Kong

10 Lo Ping Road, Tai Po, New Territories, Hong Kong, P. R. China

E-mail: kmau@eduhk.hk

H. Sun, T. Yu

Frontiers Science Center for Flexible Electronics, Shaanxi Institute of Flexible Electronics & Shaanxi

Institute of Biomedical Materials and Engineering

Northwestern Polytechnical University

127 West Youyi Road, Xi'an 710072, P.R. China

Email: iamtyu@nwpu.edu.cn

K.-H. Low

Department of Chemistry

The University of Hong Kong

Pokfulam Road, Hong Kong, P. R. China

<sup>+</sup> These authors contributed equally: Xiayu Zhang and Haodong Sun.

---

## Table of Contents

|                                                                                                                                 |           |
|---------------------------------------------------------------------------------------------------------------------------------|-----------|
| <b>Experimental Procedure</b> .....                                                                                             | <b>3</b>  |
| <b>General Methods</b> .....                                                                                                    | <b>3</b>  |
| <b>Crystal Structure Determination</b> .....                                                                                    | <b>3</b>  |
| <b>Materials</b> .....                                                                                                          | <b>4</b>  |
| <b>Syntheses</b> .....                                                                                                          | <b>4</b>  |
| <b>Scheme S1. Synthetic route for TrPEF<sub>2</sub>-IPA</b> .....                                                               | <b>4</b>  |
| Synthesis of <b>TrPEF<sub>2</sub>-Br</b> .....                                                                                  | <b>5</b>  |
| Synthesis of <b>TrPEF<sub>2</sub>-DMI</b> .....                                                                                 | <b>5</b>  |
| Synthesis of <b>TrPEF<sub>2</sub>-IPA</b> .....                                                                                 | <b>5</b>  |
| <b>Scheme S2. Cyclization reaction in the photochromism process of TrPEF<sub>2</sub>-IPA</b> .....                              | <b>6</b>  |
| Synthesis of dehydrogenated photoisomer <b>TrPEF<sub>2</sub>-IPA(O)</b> .....                                                   | <b>6</b>  |
| Dye Adsorption.....                                                                                                             | <b>6</b>  |
| <b>Table S1. Photophysical properties of TrPEF<sub>2</sub>-IPA</b> .....                                                        | <b>6</b>  |
| <b>Figure S1. FTIR spectrum of TrPEF<sub>2</sub>-IPA</b> .....                                                                  | <b>7</b>  |
| <b>Figure S2. Changes in the emission spectrum of TrPEF<sub>2</sub>-IPA</b> .....                                               | <b>7</b>  |
| <b>Figure S3. Time-resolved decay curve of TrPEF<sub>2</sub>-IPA</b> .....                                                      | <b>8</b>  |
| <b>Figure S4. The half-life period of TrPEF<sub>2</sub>-IPA in THF solution</b> .....                                           | <b>8</b>  |
| <b>Figure S5. The half-life period of the photochromic TrPEF<sub>2</sub>-IPA in the solid state</b> .....                       | <b>9</b>  |
| <b>Figure S6. Absorption switching of TrPEF<sub>2</sub>-IPA after 20 cycles</b> .....                                           | <b>9</b>  |
| <b>Figure S7. Thermogravimetric analysis profile of TrPEF<sub>2</sub>-IPA</b> .....                                             | <b>10</b> |
| <b>Figure S8. Nitrogen sorption isotherm of activated TrPEF<sub>2</sub>-IPA</b> .....                                           | <b>10</b> |
| <b>Figure S9. Changes in the UV/vis absorption spectra of the supernatant of an aqueous solution of MB</b> .....                | <b>11</b> |
| <b>Figure S10. Changes in the UV/vis absorption spectra of the supernatant of an aqueous solution of RhB</b> .....              | <b>11</b> |
| <b>Figure S11. Scanning electron microscope images of TrPEF<sub>2</sub>-IPA</b> .....                                           | <b>12</b> |
| <b>Figure S12. High-resolution transmission electron micrographs of TrPEF<sub>2</sub>-IPA</b> .....                             | <b>12</b> |
| <b>Figure S13. Modelled structure of methylene blue (MB) showing its dimensions</b> .....                                       | <b>13</b> |
| <b>Figure S14. Modelled structure of rhodamine B (RhB) showing its dimensions</b> .....                                         | <b>13</b> |
| <b>Table S2. Surface charges and pH values of TrPEF<sub>2</sub>-IPA, dyes, TrPEF<sub>2</sub>-IPA/dye mixture in water</b> ..... | <b>13</b> |
| <b>Single crystal data</b> .....                                                                                                | <b>14</b> |
| <b>Table S3. Crystal data and structural refinement for the single crystal of TrPEF<sub>2</sub>-IPA</b> .....                   | <b>14</b> |
| <b>Table S4. Bond lengths for the single crystal of TrPEF<sub>2</sub>-IPA</b> .....                                             | <b>14</b> |
| <b>Table S5. Bond angles for the single crystal of TrPEF<sub>2</sub>-IPA</b> .....                                              | <b>15</b> |
| <b>Figure S15. Molecular structure of an independent molecule of TrPEF<sub>2</sub>-IPA</b> .....                                | <b>15</b> |
| <b>Characterization of the compounds</b> .....                                                                                  | <b>16</b> |
| <b>Figure S16. <sup>1</sup>H NMR spectrum of TrPEF<sub>2</sub>-DMI in DMSO-<i>d</i><sub>6</sub></b> .....                       | <b>16</b> |
| <b>Figure S17. <sup>1</sup>H NMR spectrum of TrPEF<sub>2</sub>-IPA in DMSO-<i>d</i><sub>6</sub></b> .....                       | <b>16</b> |
| <b>Figure S18. <sup>1</sup>H NMR spectrum of TrPEF<sub>2</sub>-IPA(O) in DMSO-<i>d</i><sub>6</sub></b> .....                    | <b>17</b> |
| <b>Figure S19. High resolution mass spectrum of TrPEF<sub>2</sub>-DMI</b> .....                                                 | <b>18</b> |
| <b>Figure S20. High resolution mass spectrum of TrPEF<sub>2</sub>-IPA</b> .....                                                 | <b>18</b> |
| <b>References</b> .....                                                                                                         | <b>18</b> |

---

## Experimental Procedure

### General Methods

<sup>1</sup>H Nuclear magnetic resonance (<sup>1</sup>H NMR) spectra for the compounds were obtained on a Bruker Avance NEO 500 Nuclear Magnetic Resonance Spectrometer with DMSO-*d*<sub>6</sub> as solvent and tetramethylsilane (TMS) as the internal standard. High resolution mass spectra (MS) were recorded on a TSQ Fortis Triple Quadrupole Mass Spectrometer with Ultra HPLC & Q Exactive High Resolution Mass Spectrometer System. Thermogravimetric analysis was performed on a PerkinElmer Thermogravimetric Analyzer TGA 4000. Fourier transform infrared (FTIR) spectroscopy was conducted on a PerkinElmer Frontier FTIR spectrophotometer (4000–530 cm<sup>-1</sup>) with a universal ATR accessory. Gas adsorption isotherms were collected using a Micromeritics 3Flex Accelerated Surface Area and Porosity Analyzer. Microscopic images were collected on a TESCAN MIRA LMS scanning electron microscope (SEM) and a FEI Talos F200s high-resolution transmission electron microscope (HR-TEM). Zeta potential measurements were performed on a Malvern Zetasizer Nano ZSE particle characterization system. UV-Vis absorption spectra, emission spectra and fluorescence lifetimes were obtained on a Hitachi U-3900H UV-vis spectrometer, an Edinburgh FS5 fluorescence spectrophotometer and a Hitachi F-7100 fluorescence spectrophotometer, respectively. Photochromic UV-vis absorption spectra were measured on an Ocean Optic QE 65Pro spectrometer. DFT calculations at B3LYP functional with 6-311G\* basis set level were performed based on the single crystal structure using the Gaussian 09 software on the grounds of previous literatures.<sup>1</sup>

### Crystal Structure Determination

Crystals suitable for X-ray diffraction were mounted on a MiTeGen dual-thickness micro-mount and placed under a cold stream of nitrogen (Oxford). Single-crystal X-ray diffraction measurements were recorded on a Bruker D8 VENTURE Duo FIXED-CHI X-Ray Diffractometer using a  $\mu$ S micro-focus Mo-K $\alpha$  radiation ( $\lambda = 0.71073 \text{ \AA}$ ) with a Quazar multilayer optics. Data collection was conducted with the *APEX3* v2019.3-2click4 (Bruker Nano, 2019) program. Cell refinement and data reduction were performed with the *SAINT* V8.38A (Bruker AXS Inc., 2017) program. The structure was solved using *XT* 2014/5<sup>2a</sup> in the *APEX3* suite and refined with *SHELXL*2018/3.<sup>2b</sup> Hydrogen atoms were placed in idealised positions and were set riding on the respective parent atoms. All non-hydrogen atoms were refined with anisotropic thermal parameters. The structure was refined by weighted least

squares refinement on  $F^2$  to convergence. All e.s.d.'s (except the e.s.d. in the dihedral angle between two least-square planes) are estimated using the full covariance matrix. The X-ray crystallographic data of **TrPEF<sub>2</sub>-IPA** has been deposited at the Cambridge Crystallographic Data Centre (CCDC), under the deposition number CCDC 2179741. The data can be obtained free of charge from the Cambridge Crystallographic Data Center (<https://www.ccdc.cam.ac.uk/structures/>).

## Materials

4-Bromobenzyl bromide, triethyl phosphite, 4,4'-difluorobenzophenone, potassium *tert*-butoxide (*t*-BuOK), 3-(methoxycarbonyl)phenyl boronic acid, tetrakis(triphenylphosphine)-palladium (Pd(PPh<sub>3</sub>)<sub>4</sub>), potassium carbonate, magnesium sulfate (MgSO<sub>4</sub>) and potassium hydroxide (KOH) were purchased from Dieckmann (Hong Kong) Chemical Industry Company Limited. Ethanol, *n*-hexane, dichloromethane (CH<sub>2</sub>Cl<sub>2</sub>) and tetrahydrofuran (THF), were purchased from Oriental Chemicals & Lab. Supplies Ltd. All other reagents were commercially available and used as received.

## Syntheses

The synthetic route of 4'-(2,2-bis(4-fluorophenyl)vinyl)-[1,1'-biphenyl]-3,5-dicarboxylic acid (**TrPEF<sub>2</sub>-IPA**) is illustrated in Scheme S1. Diethyl (4-bromobenzyl)phosphonate was prepared according to a procedure reported in literature.<sup>1</sup>

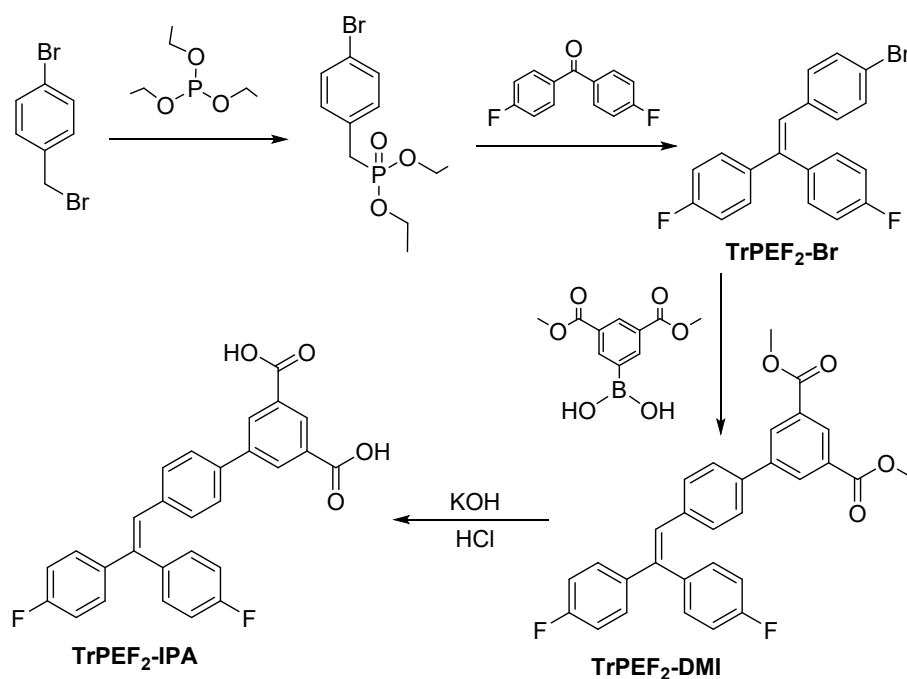

**Scheme S1.** Synthetic route for **TrPEF<sub>2</sub>-IPA**.

### Synthesis of TrPEF<sub>2</sub>-Br

The compound was synthesised according to a modified literature procedure.<sup>1</sup> To a two-necked round-bottomed flask containing 4,4'-difluorobenzophenone (2.74 g, 12.54 mmol) and diethyl (4-bromobenzyl)phosphonate (3.50 g, 11.40 mmol) was added degassed THF (70 mL) under an argon atmosphere. After cooling to 0 °C, *t*-BuOK (3.84 g, 34.19 mmol) was added. Upon stirring for 4 hours under an argon atmosphere, the mixture was poured into ethanol/deionised water (250 ml, 3:2 v/v), and stirred for another 1 hour. The white precipitate which formed was collected by filtration. The precipitate was dissolved in CH<sub>2</sub>Cl<sub>2</sub> and washed 3 times with water. The organic layer was dried over anhydrous MgSO<sub>4</sub>. After evaporation of the filtrate, the residue was purified by recrystallization via vapor diffusion of hexane into a concentrated dichloromethane solution of the product to give **TrPEF<sub>2</sub>-Br** (3.50 g, 82.7 %) as a white powder.

### Synthesis of TrPEF<sub>2</sub>-DMI

A mixture **TrPEF<sub>2</sub>-Br** (1.00 g, 2.69 mmol), 3-(methoxycarbonyl)phenyl boronic acid (961.69 mg, 4.04 mmol) and potassium carbonate (1.61 g, 11.63 mmol) was dissolved in tetrahydrofuran/deionised water (50 mL, 4:1 v/v). The reaction mixture was stirred at room temperature under nitrogen for 30 min, and then Pd(PPh<sub>3</sub>)<sub>4</sub> (93.39 mg, 61 mmol) was added. The resulting solution was heated at 85 °C for 24 h. After the reaction was completed, the mixture was poured into water and extracted 3 times with dichloromethane. The organic layer was dried over anhydrous MgSO<sub>4</sub>. After removing the solvent under reduced pressure, the crude product was purified by column chromatography on silica gel (dichloromethane/*n*-hexane, 1:5 v/v) to obtain **TrPEF<sub>2</sub>-DMI** (1.03 g, 78.9 %) as a white solid. <sup>1</sup>H NMR (500 MHz, DMSO-*d*<sub>6</sub>) δ (TMS, ppm): 8.43 (d, *J* = 3.5 Hz, 1H), 8.38 (d, *J* = 2 Hz, 2H), 7.63–7.30 (d, *J* = 10.5 Hz, 2H), 7.38–7.35 (m, 2H), 7.31–7.19 (m, 6H), 7.16–7.15 (m, 2H). EI-MS: *m/z* found: 507.13515 [M+Na]<sup>+</sup>; calcd for C<sub>30</sub>H<sub>22</sub>F<sub>2</sub>O<sub>4</sub>: 507.13784.

### Synthesis of TrPEF<sub>2</sub>-IPA

To a solution of **TrPEF<sub>2</sub>-DMI** (0.60 g, 1.44 mmol) in THF/H<sub>2</sub>O (20 mL, 1:1 v/v) was added KOH (2.08 g, 37.15 mmol). The resulting mixture was refluxed for 1 d. After cooling to room temperature, the pH value of the mixture was adjusted to 1.0 by adding 1 M HCl, and then the reaction mixture was filtered to afford **TrPEF<sub>2</sub>-IPA** as a white solid. Yield: 0.51 g (90.2 %). <sup>1</sup>H NMR (500 MHz, DMSO-*d*<sub>6</sub>) δ (TMS, ppm): 13.38 (s, 2H), 8.43 (s, 1H), 8.43 (s, 2H), 7.60–7.58 (d, *J* = 10.5 Hz, 2H), 7.37–7.34 (d, *J* = 7 Hz, 2H), 7.28–7.19 (m, 6H), 7.16–7.14 (m, 3H). EI-MS: *m/z* found: 456.11230 [M]<sup>-</sup>; calcd for C<sub>28</sub>H<sub>18</sub>F<sub>2</sub>O<sub>4</sub>: 456.11732.

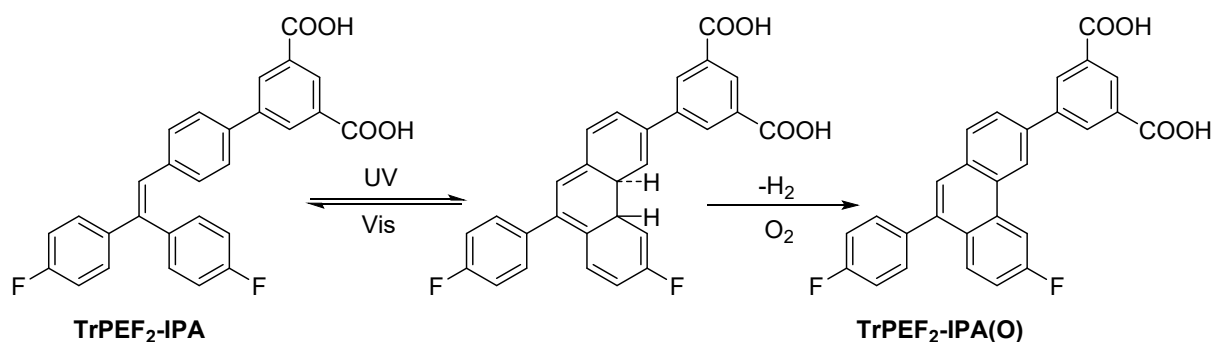

**Scheme S2.** Cyclization reaction in the photochromism process of **TrPEF<sub>2</sub>-IPA**, and the subsequent dehydrogenation to form **TrPEF<sub>2</sub>-IPA(O)**.

### Synthesis of dehydrogenated photoisomer **TrPEF<sub>2</sub>-IPA(O)**

A mixture of **TrPEF<sub>2</sub>-IPA** (100.0 mg, 0.22 mmol) in THF (10 ml) was irradiated with UV-light in a vial under oxygen for 12 h. The mixture was dissolved in 20 ml dichloromethane and washed with MgSO<sub>4</sub> aqueous solution for 3 times. The mixture was further purified by column chromatography with ethyl acetate/n-hexane as eluent. A white solid named **TrPEF<sub>2</sub>-IPA(O)** was obtained. Yield: 80.0 mg (80.35 %). <sup>1</sup>H NMR (500 MHz, DMSO-*d*<sub>6</sub>) δ (TMS, ppm): 13.48 (s, 2H), 9.19 (s, 1H), 9.07–9.05 (d, *J* = 12 Hz, 2H), 8.46 (s, 2H), 8.54 (s, 1H), 8.17–8.15 (d, *J* = 8.5 Hz, 1H), 8.06–8.04 (d, *J* = 8.5 Hz, 1H), 7.84–7.81 (m, 2H), 7.61–7.58 (m, 2H), 7.54–7.51 (m, 1H), 7.42–7.39 (m, 2H).

### Dye Adsorption

**TrPEF<sub>2</sub>-IPA** (15 mg) was soaked in an aqueous solution (20 mL) of methylene blue (MB; 18 mg L<sup>-1</sup>) or rhodamine B (RhB; 15 mg L<sup>-1</sup>). The mixture was magnetically stirred at room temperature in the dark for 48 h. Sample was extracted from the stirred suspension and centrifuged to remove the adsorbent. A clear supernatant was obtained for UV/vis absorption measurements.

**Table S1.** Photophysical properties of **TrPEF<sub>2</sub>-IPA**.

| Sample                       | State  | Fluorescence              |                        | Photochromism             |
|------------------------------|--------|---------------------------|------------------------|---------------------------|
|                              |        | $\lambda_{\text{F}}$ (nm) | $\tau_{\text{F}}$ (ns) | $\lambda_{\text{P}}$ (nm) |
| <b>TrPEF<sub>2</sub>-IPA</b> | Powder | 445                       | 2.1                    | 462                       |
|                              | In THF | 444                       | –                      | 502                       |

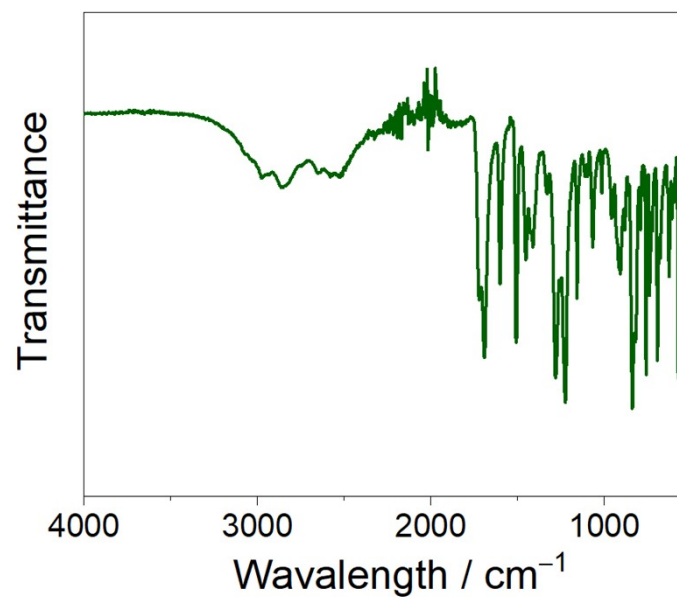

**Figure S1.** FTIR spectrum of TrPEF<sub>2</sub>-IPA.

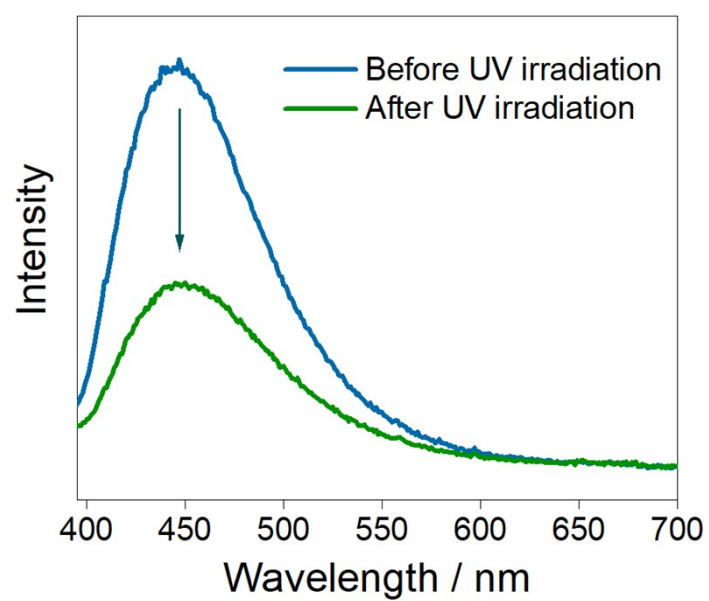

**Figure S2.** Changes in the emission spectrum of TrPEF<sub>2</sub>-IPA after prolonged persistent UV light irradiation at 365 nm in the solid state at room temperature.

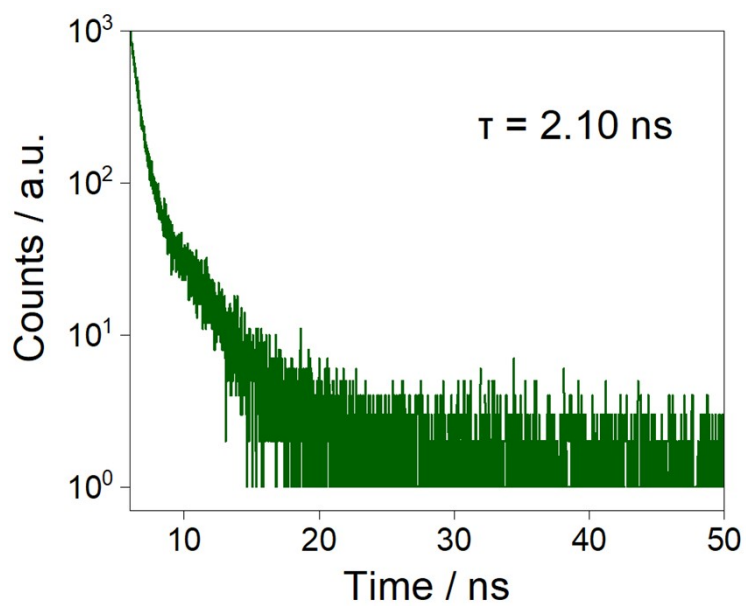

**Figure S3.** Time-resolved decay curve of TrPEF<sub>2</sub>-IPA upon photoexcitation at 365 nm in the solid state at room temperature.

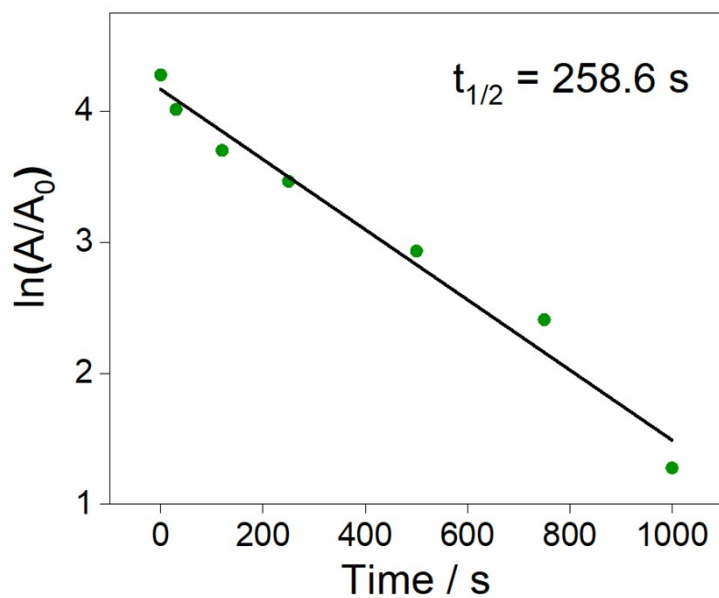

**Figure S4.** The half-life period of TrPEF<sub>2</sub>-IPA in THF solution under prolonged visible light irradiation at room temperature.



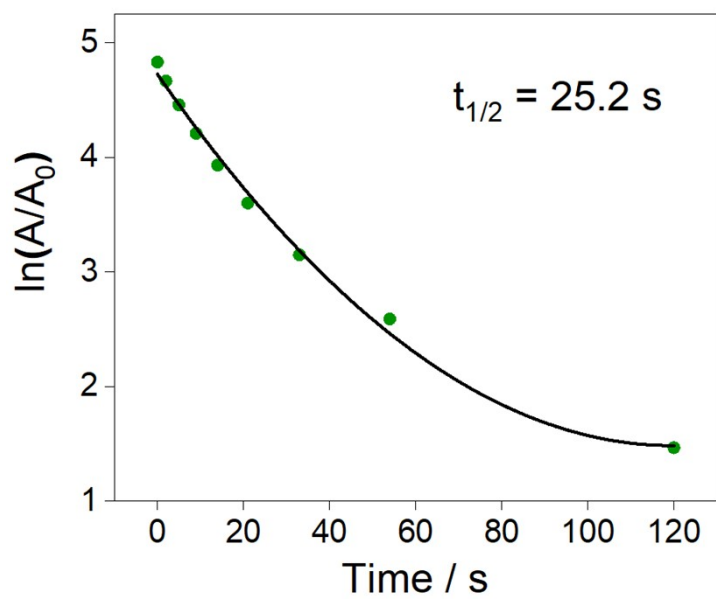

**Figure S5.** The half-life period of the photochromic **TrPEF<sub>2</sub>-IPA** in the solid state under prolonged visible light irradiation at room temperature.

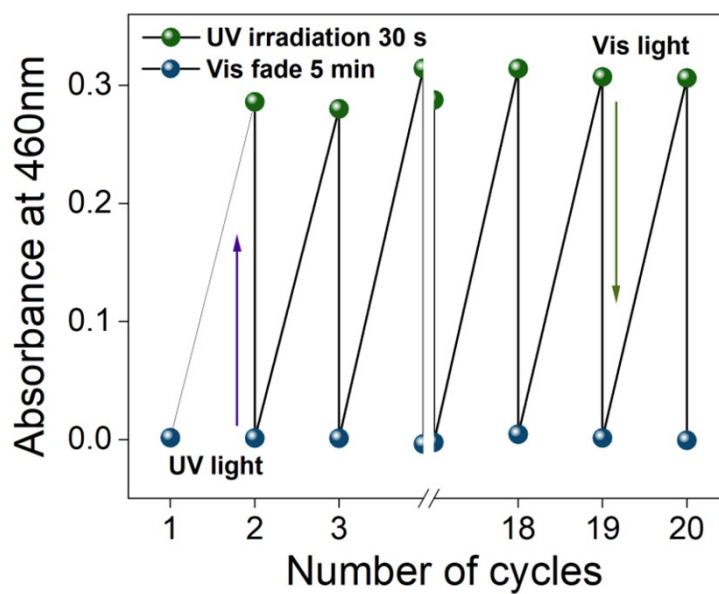

**Figure S6.** Absorption switching of **TrPEF<sub>2</sub>-IPA** in THF solution at 460 nm after 20 cycles of alternate UV and visible light irradiation at room temperature.

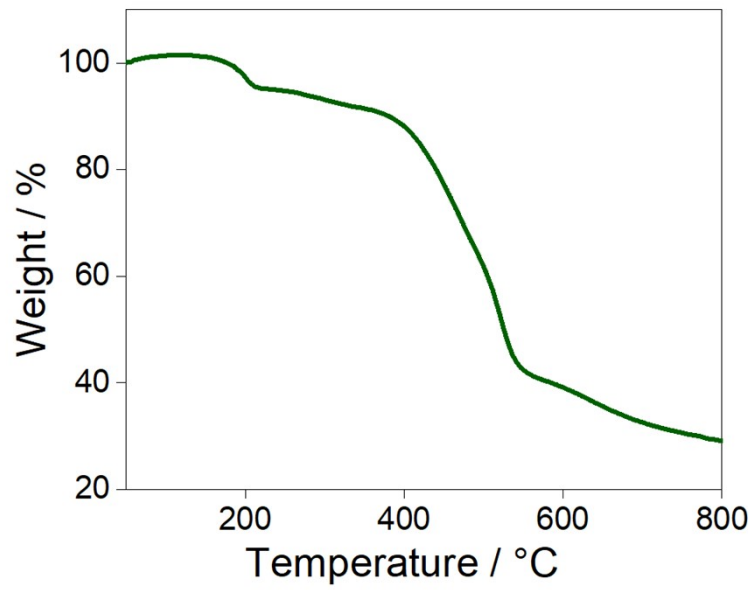

**Figure S7.** Thermogravimetric analysis profile of **TrPEF<sub>2</sub>-IPA**.

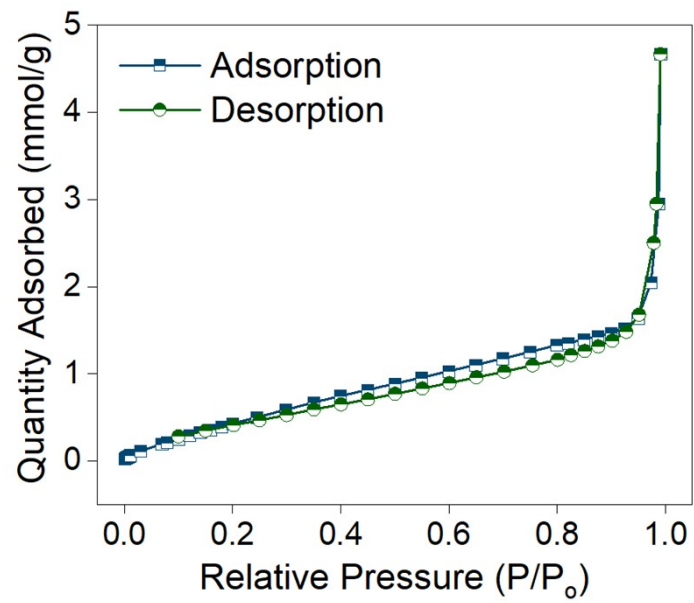

**Figure S8.** Nitrogen sorption isotherm of activated **TrPEF<sub>2</sub>-IPA**.

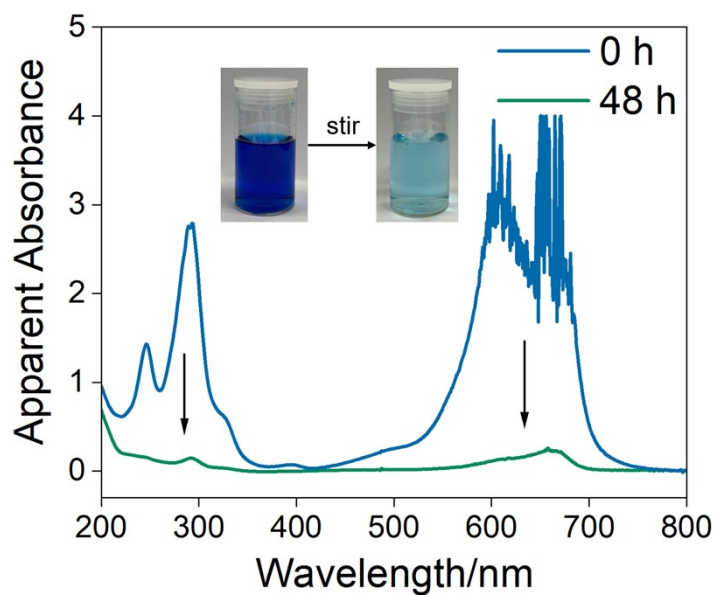

**Figure S9.** Changes in the UV/vis absorption spectra of the supernatant of an aqueous solution of MB after the adsorption by **TrPEF<sub>2</sub>-IPA** for 48 h. Insets show photographs of the corresponding colour changes.

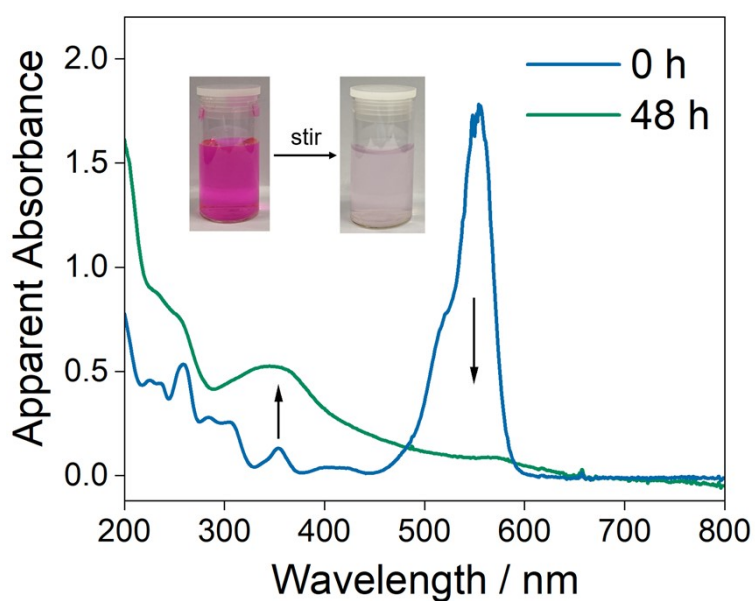

**Figure S10.** Changes in the UV/vis absorption spectra of the supernatant of an aqueous solution of RhB after the adsorption by **TrPEF<sub>2</sub>-IPA** for 48 h. Insets show photographs of the corresponding colour changes.

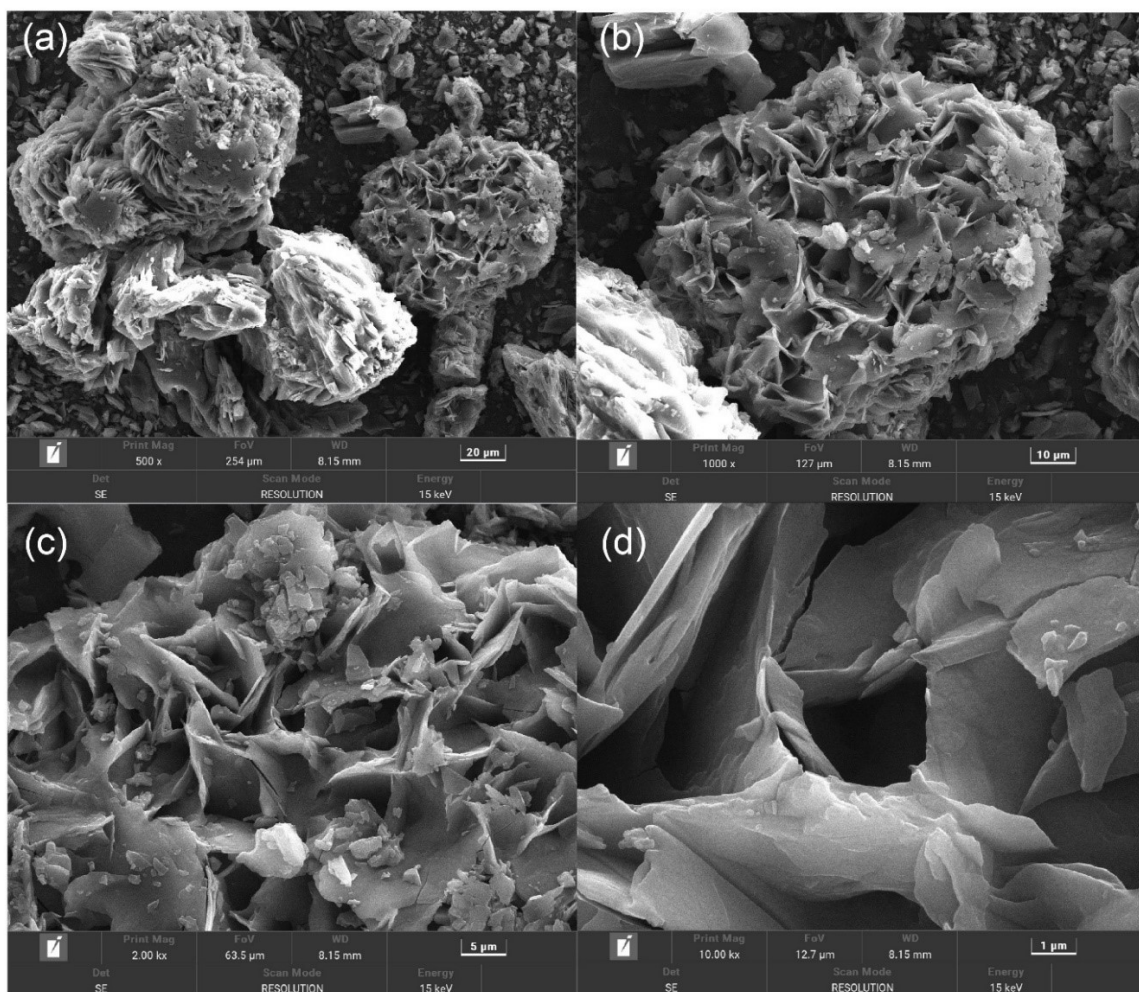

**Figure S11.** Scanning electron micrographs of TrPEF<sub>2</sub>-IPA at different magnifications.

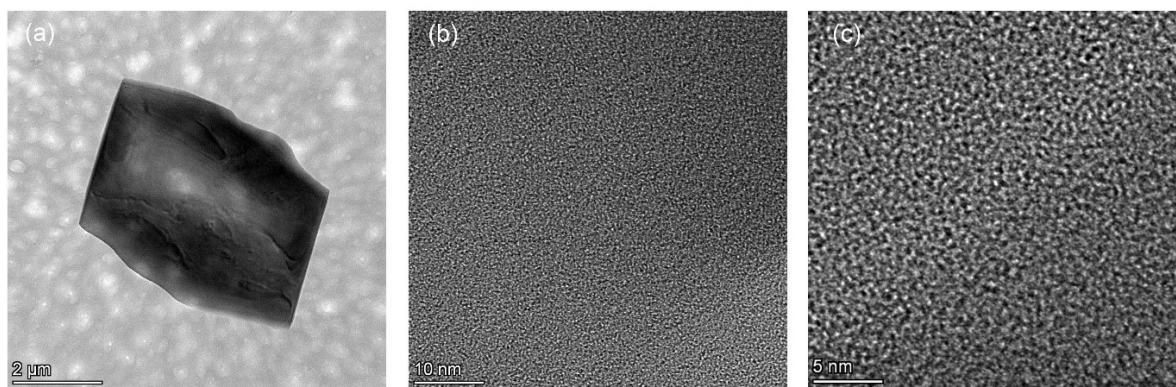

**Figure S12.** High-resolution transmission electron micrographs of TrPEF<sub>2</sub>-IPA at different magnifications.

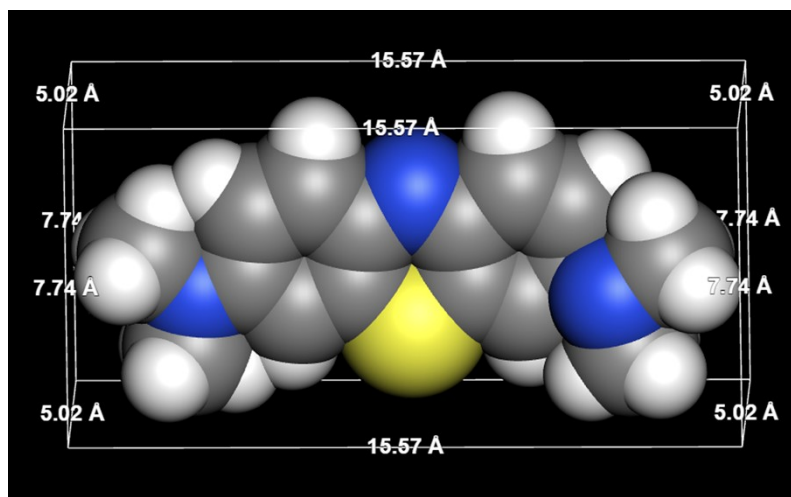

**Figure S13.** Modelled structure of methylene blue (MB) showing its dimensions.

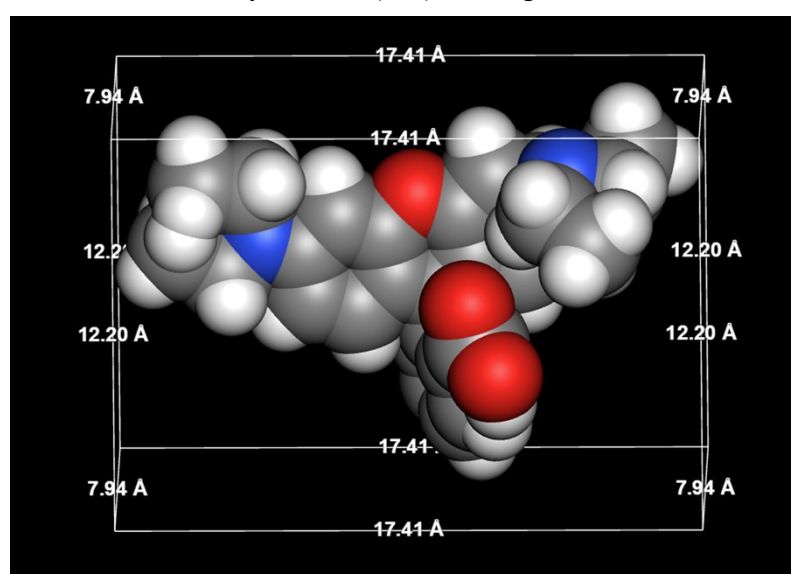

**Figure S14.** Modelled structure of rhodamine B (RhB) showing its dimensions.

**Table S2.** Surface charges and pH values of TrPEF<sub>2</sub>-IPA, MB, RhB, TrPEF<sub>2</sub>-IPA/MB mixture and TrPEF<sub>2</sub>-IPA/RhB mixture in water.

|                | TrPEF <sub>2</sub> -IPA | Methylene Blue (MB) | Rhodamine B (RhB) | TrPEF <sub>2</sub> -IPA/MB | TrPEF <sub>2</sub> -IPA/RhB |
|----------------|-------------------------|---------------------|-------------------|----------------------------|-----------------------------|
| Surface charge | -33 mV                  | -13.6 mV            | -16.8 mV          | -20.8 mV                   | -20.3 mV                    |
| pH value       | 5.98                    | 5.73                | 5.90              | 6.61                       | 6.25                        |

## Single crystal data

**Table S3.** Crystal data and structural refinement for the single crystal of TrPEF<sub>2</sub>-IPA.

|                                |                                                                                                |                                                       |                                          |
|--------------------------------|------------------------------------------------------------------------------------------------|-------------------------------------------------------|------------------------------------------|
| <b>Formula</b>                 | C <sub>28</sub> H <sub>18</sub> F <sub>2</sub> O <sub>4</sub> ·C <sub>2</sub> H <sub>6</sub> O | <b>Z</b>                                              | 2                                        |
| <b>Formula weight</b>          | 502.49                                                                                         | <b><math>\mu</math> / mm<sup>-1</sup></b>             | 0.10                                     |
| <b>Temperature / K</b>         | 192.99                                                                                         | <b>F(000)</b>                                         | 524                                      |
| <b>Crystal system</b>          | triclinic                                                                                      | <b>Crystal size / mm<sup>3</sup></b>                  | 0.16 × 0.16 × 0.12                       |
| <b>Space group</b>             | <i>P</i> -1                                                                                    | <b>Radiation</b>                                      | MoK $\alpha$<br>( $\lambda = 0.71073$ Å) |
| <b>a / Å</b>                   | 9.6027(19)                                                                                     | <b>Reflections collected</b>                          | 29719 / 5752 / 3084                      |
| <b>b / Å</b>                   | 9.943(2)                                                                                       | <b>/ independent / observed</b>                       |                                          |
| <b>c / Å</b>                   | 14.283(3)                                                                                      | <b><math>D_x</math> / g cm<sup>-3</sup></b>           | 1.291                                    |
| <b><math>\alpha</math> / °</b> | 95.747(7)                                                                                      | <b><math>R_{int}</math></b>                           | 0.083                                    |
| <b><math>\beta</math> / °</b>  | 98.450(7)                                                                                      | <b>Goodness-of-fit on <math>F^2</math></b>            | 1.016                                    |
| <b><math>\gamma</math> / °</b> | 104.466(5)                                                                                     | <b><math>R_1,^a wR_2^b [I \geq 2\sigma(I)]</math></b> | $R_1 = 0.0536,$<br>$wR_2 = 0.1107$       |
| <b>Volume / Å<sup>3</sup></b>  | 1292.8(5)                                                                                      | <b><math>R_1, wR_2</math> [all data]</b>              | $R_1 = 0.1330,$<br>$wR_2 = 0.1364$       |

<sup>a</sup>  $R_1 = \sum ||F_o| - |F_c|| / \sum |F_o|$ . <sup>b</sup>  $wR_2 = [\sum [w(F_o^2 - F_c^2)^2] / \sum w(F_o^2)^2]^{1/2}$ , where  $w = 1/[^2(F_o)^2 + (aP)^2 + bP]$  and  $P = (F_o^2 + 2F_c^2)/3$ .

**Table S4.** Bond lengths for the single crystal of TrPEF<sub>2</sub>-IPA.

| <b>Atom</b> | <b>Atom</b> | <b>Length / Å</b> | <b>Atom</b> | <b>Atom</b> | <b>Length / Å</b> |
|-------------|-------------|-------------------|-------------|-------------|-------------------|
| F1          | C26         | 1.365(2)          | C10         | C11         | 1.392(3)          |
| F2          | C20         | 1.369(2)          | C11         | C12         | 1.402(3)          |
| O1          | C7          | 1.217(2)          | C16         | C17         | 1.496(3)          |
| O2          | C7          | 1.314(2)          | C16         | C23         | 1.497(3)          |
| O3          | C8          | 1.323(2)          | C17         | C22         | 1.398(3)          |
| O4          | C8          | 1.209(2)          | C17         | C18         | 1.404(3)          |
| C1          | C2          | 1.394(3)          | C18         | C19         | 1.397(3)          |
| C1          | C6          | 1.396(2)          | C19         | C20         | 1.364(3)          |
| C1          | C7          | 1.495(3)          | C20         | C21         | 1.375(3)          |
| C2          | C3          | 1.402(2)          | C21         | C22         | 1.389(3)          |
| C3          | C4          | 1.395(2)          | C23         | C24         | 1.394(3)          |
| C3          | C9          | 1.492(3)          | C23         | C28         | 1.398(3)          |
| C4          | C5          | 1.399(3)          | C24         | C25         | 1.383(3)          |
| C5          | C6          | 1.393(3)          | C25         | C26         | 1.380(3)          |
| C5          | C8          | 1.494(3)          | C26         | C27         | 1.371(3)          |
| C9          | C10         | 1.397(3)          | C27         | C28         | 1.385(3)          |
| C9          | C14         | 1.400(3)          |             |             |                   |

**Table S5.** Bond angles for the single crystal of TrPEF<sub>2</sub>-IPA.

| Atom | Atom | Atom | Angle / °  | Atom | Atom | Atom | Angle / °  |
|------|------|------|------------|------|------|------|------------|
| C2   | C1   | C6   | 119.97(17) | C11  | C12  | C15  | 119.52(17) |
| C2   | C1   | C7   | 118.23(17) | C16  | C15  | C12  | 128.83(18) |
| C6   | C1   | C7   | 121.75(17) | C15  | C16  | C17  | 119.31(17) |
| C1   | C2   | C3   | 121.55(17) | C15  | C16  | C23  | 122.39(18) |
| C4   | C3   | C2   | 117.57(17) | C17  | C16  | C23  | 118.20(16) |
| C4   | C3   | C9   | 121.33(16) | C22  | C17  | C18  | 117.75(19) |
| C2   | C3   | C9   | 121.10(16) | C22  | C17  | C16  | 121.58(18) |
| C3   | C4   | C5   | 121.57(17) | C18  | C17  | C16  | 120.64(18) |
| C6   | C5   | C4   | 119.92(17) | C19  | C18  | C17  | 120.7(2)   |
| C6   | C5   | C8   | 118.80(17) | C20  | C19  | C18  | 119.1(2)   |
| C4   | C5   | C8   | 121.28(17) | C19  | C20  | F2   | 118.8(2)   |
| C5   | C6   | C1   | 119.42(17) | C19  | C20  | C21  | 122.4(2)   |
| O1   | C7   | O2   | 123.96(18) | F2   | C20  | C21  | 118.8(2)   |
| O1   | C7   | C1   | 121.64(19) | C20  | C21  | C22  | 118.5(2)   |
| O2   | C7   | C1   | 114.40(17) | C21  | C22  | C17  | 121.5(2)   |
| O4   | C8   | O3   | 123.51(19) | C24  | C23  | C28  | 118.46(18) |
| O4   | C8   | C5   | 123.96(18) | C24  | C23  | C16  | 121.10(17) |
| O3   | C8   | C5   | 112.53(18) | C28  | C23  | C16  | 120.44(17) |
| C10  | C9   | C14  | 117.73(18) | C25  | C24  | C23  | 121.0(2)   |
| C10  | C9   | C3   | 121.19(17) | C26  | C25  | C24  | 118.4(2)   |
| C14  | C9   | C3   | 121.07(17) | F1   | C26  | C27  | 118.8(2)   |
| C11  | C10  | C9   | 121.36(18) | F1   | C26  | C25  | 118.3(2)   |
| C10  | C11  | C12  | 120.66(18) | C27  | C26  | C25  | 122.87(19) |
| C13  | C12  | C11  | 117.77(18) | C26  | C27  | C28  | 118.1(2)   |
| C13  | C12  | C15  | 122.66(18) | C27  | C28  | C23  | 121.26(19) |

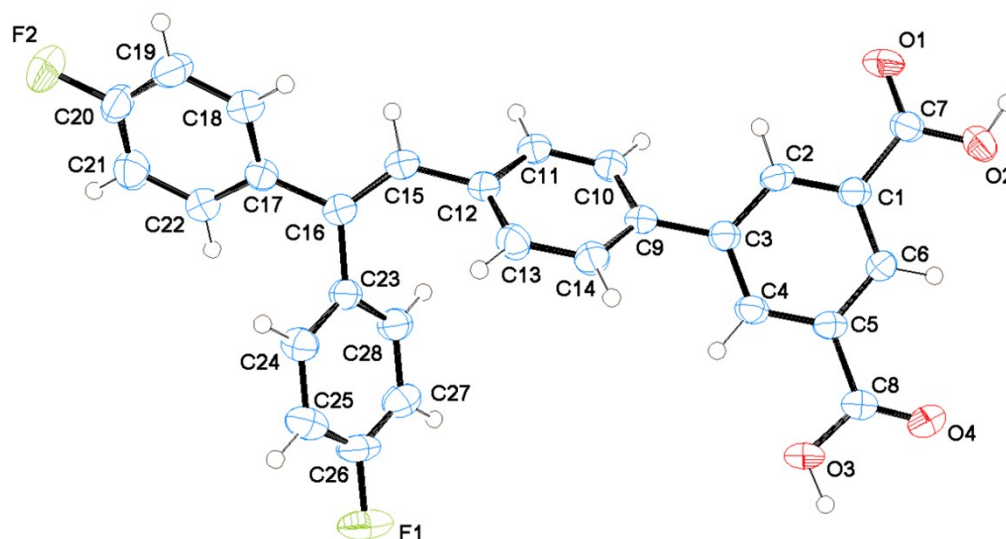**Figure S15.** Molecular structure of an independent molecule of TrPEF<sub>2</sub>-IPA with the atomic numbering scheme. Solvent molecules are omitted for clarity. Thermal ellipsoids are drawn at the 30% probability level.

## Characterization of the compounds

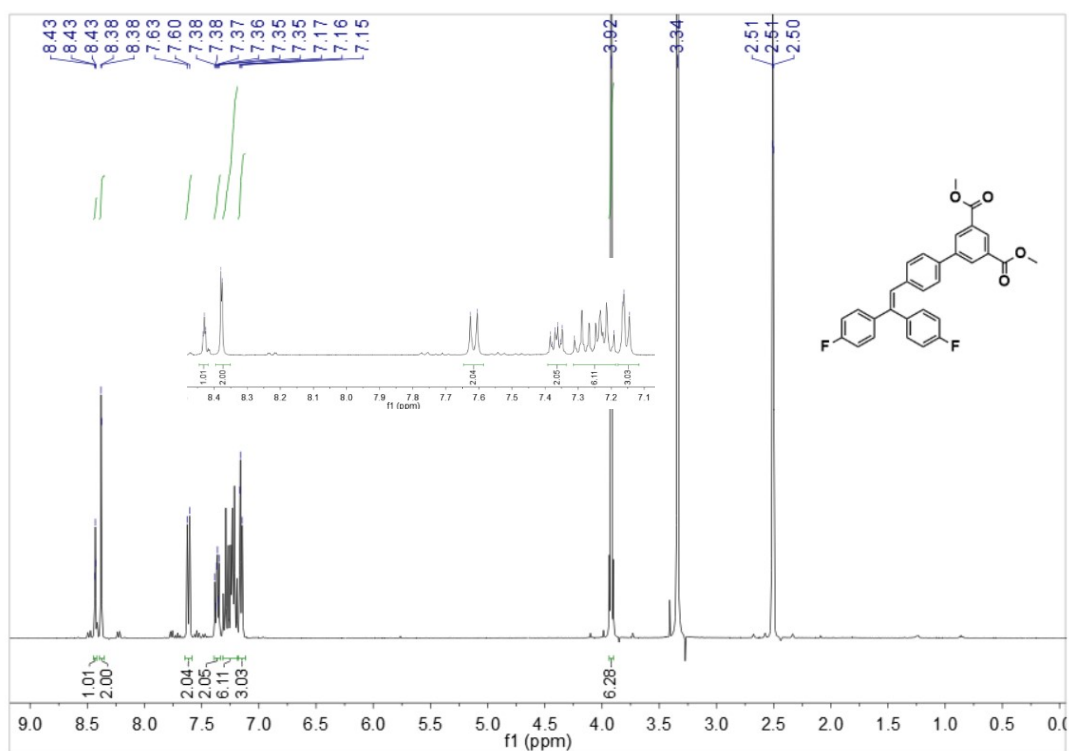

**Figure S16.**  $^1\text{H}$  NMR spectrum of TrPEF<sub>2</sub>-DMI in DMSO-*d*<sub>6</sub>.

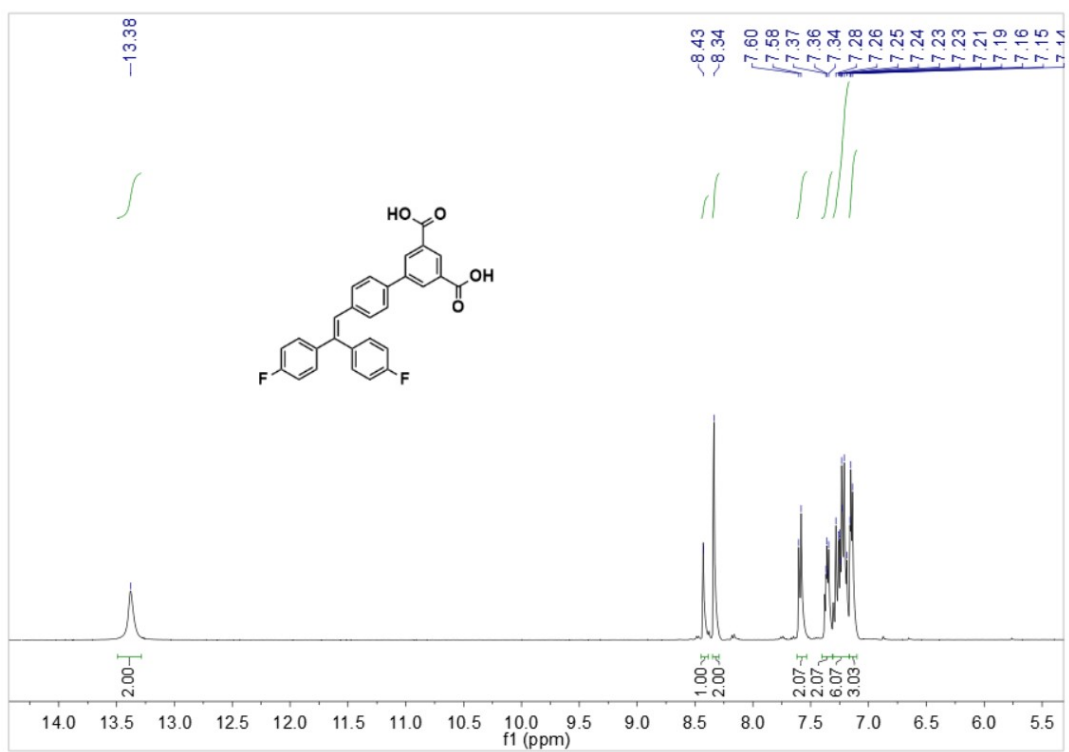

**Figure S17.**  $^1\text{H}$  NMR spectrum of TrPEF<sub>2</sub>-IPA in DMSO-*d*<sub>6</sub>.





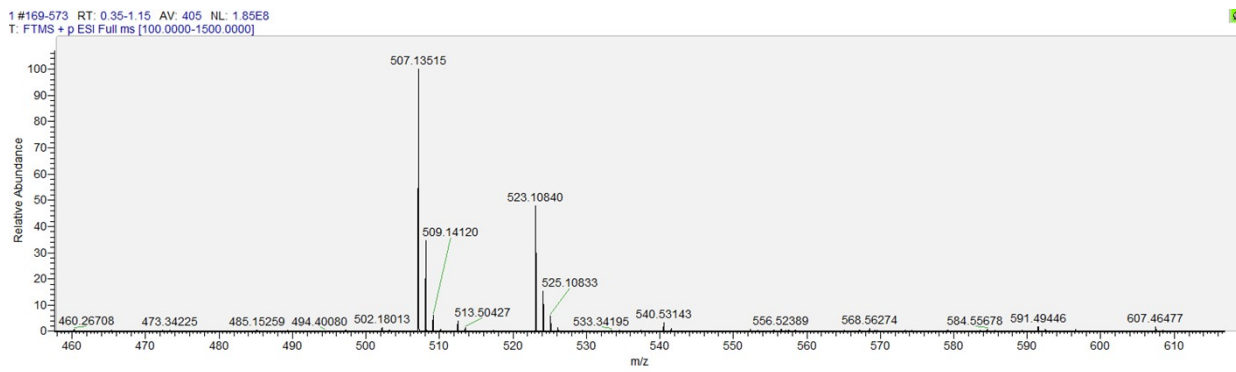

**Figure S19.** High resolution mass spectrum of TrPEF<sub>2</sub>-DMI.

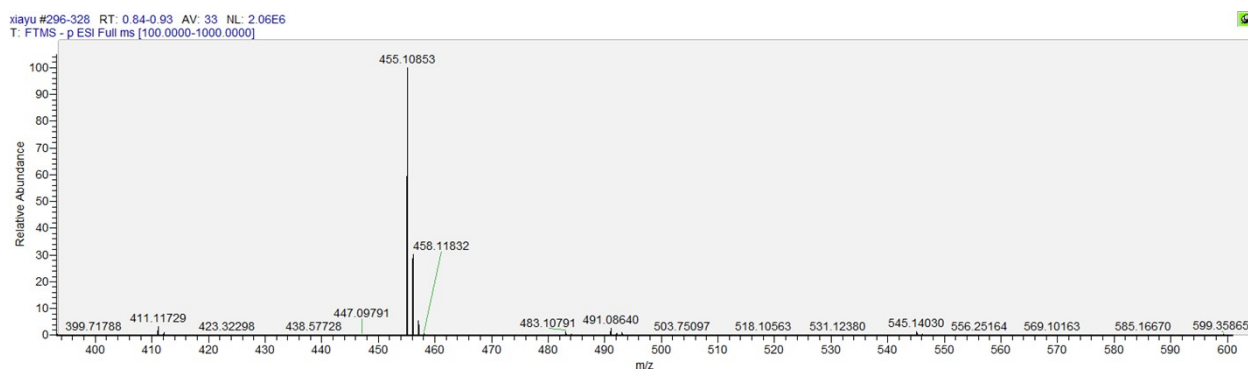

**Figure S20.** High resolution mass spectrum of TrPEF<sub>2</sub>-IPA.

## References

- a) R. Baker, R. J. Sims, *Synthesis* **1981**, 2, 117; b) D. Ou, T. Yu, Z. Yang, T. Luan, Z. Mao, Y. Zhang, S. Liu, J. Xu, Z. Chi, M. R. Bryce, *Chem. Sci.* **2016**, 7, 5302; c) Tian Lu, Feiwu Chen, *J. Comput. Chem.* **2012**, 33, 580-592.
- a) G. M. Sheldrick, *Acta Cryst.* **2015**, A71, 3; b) G. M. Sheldrick, *Acta Cryst.* **2015**, C71, 3.
